# Supplementary material for: Differences in Placental Imprinted Gene Expression across Preeclamptic and Non-Preeclamptic Pregnancies
Source: Genes (Basel). 2020 Sep 29;11(10):1146. doi: 10.3390/genes11101146 (PMC7601230; doi:10.3390/genes11101146)
Supplement: Supplementary file 1 [file genes-11-01146-s001.pdf]

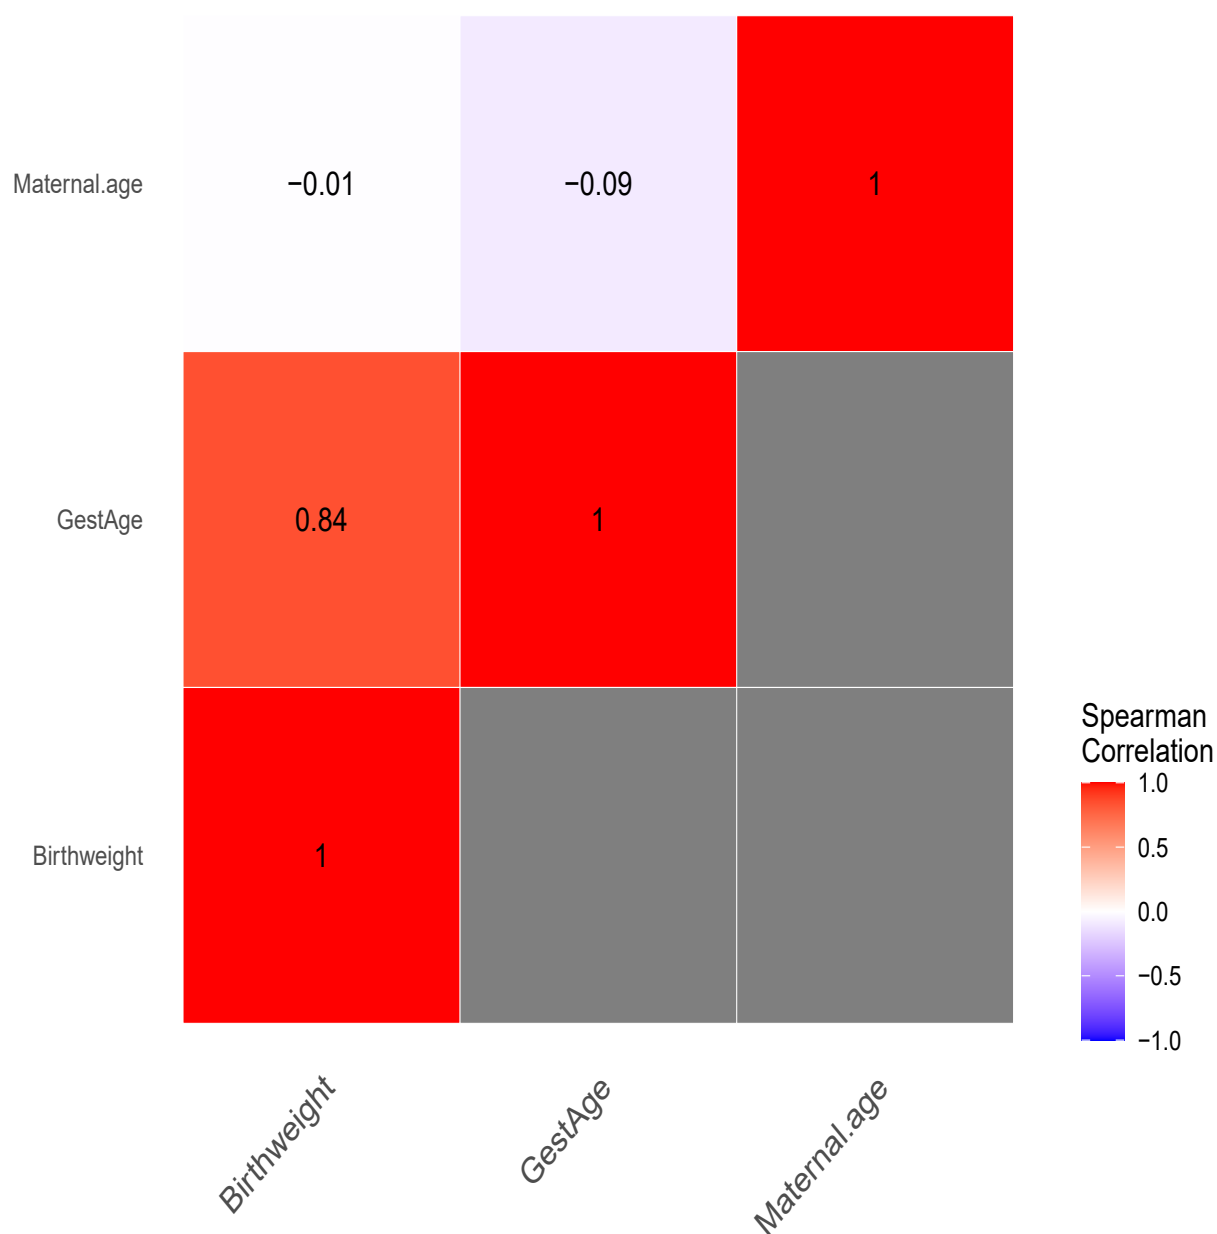

**Figure S1. Correlation among continuous demographic variables.** Gestational age and birthweight are significantly, positively correlated with one another ( $p < 0.01$ )

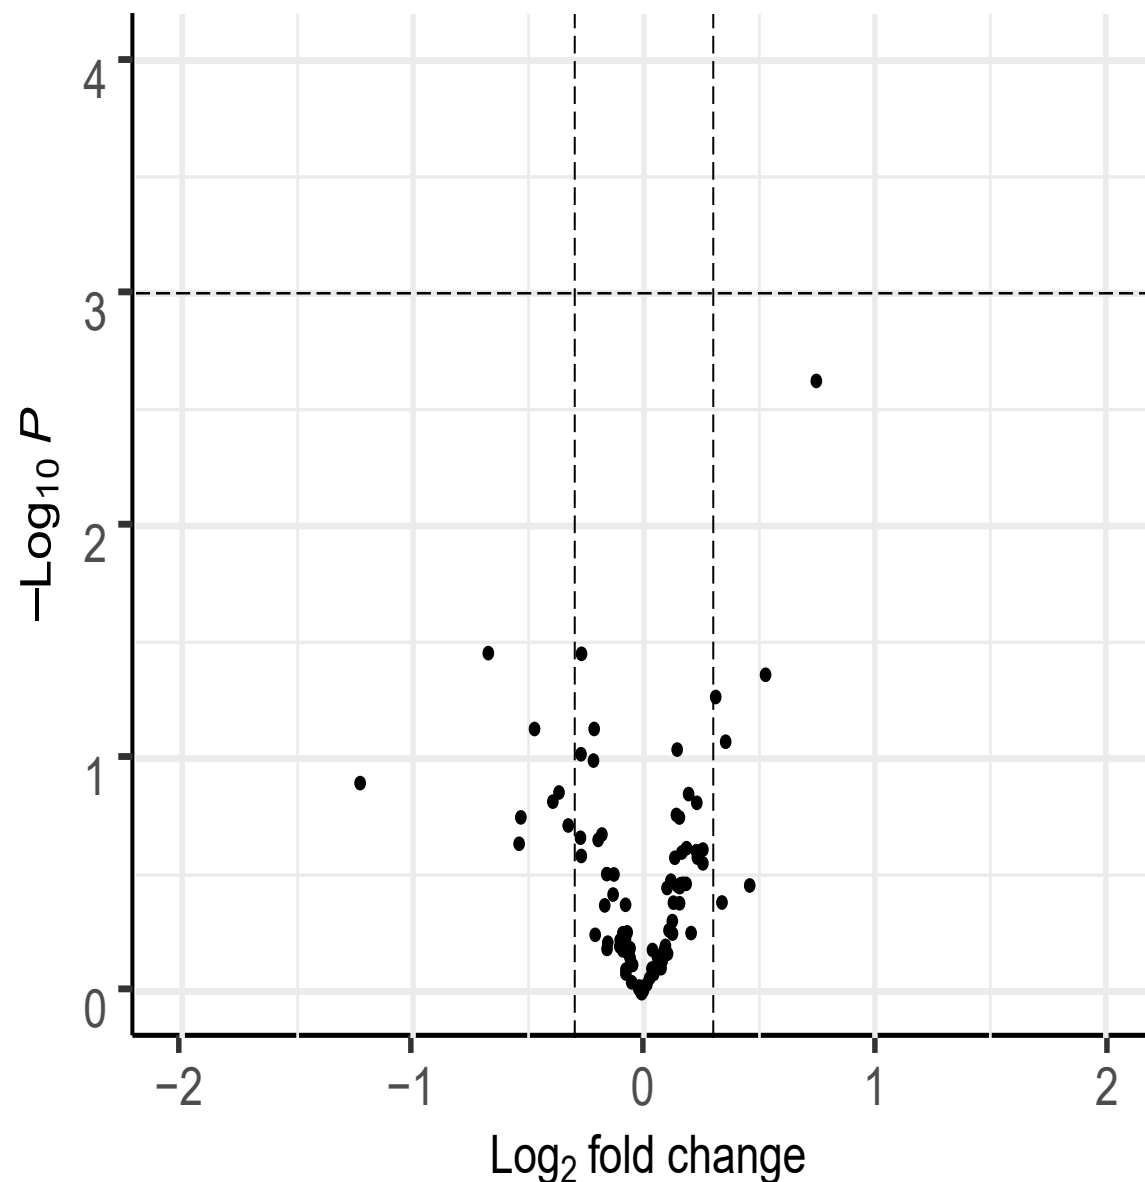

**Figure S2. Differential gene expression analysis comparing preterm and term controls.** Volcano plot depicting Log<sub>2</sub> fold change values on the x-axis and -Log<sub>10</sub> p-values on the y-axis. Points falling above the dashed horizontal line indicate genes that are significantly differentially expressed based on an FDR < 0.05. No differences in gene expression levels are observed comparing normotensive placenta delivered preterm and at term.

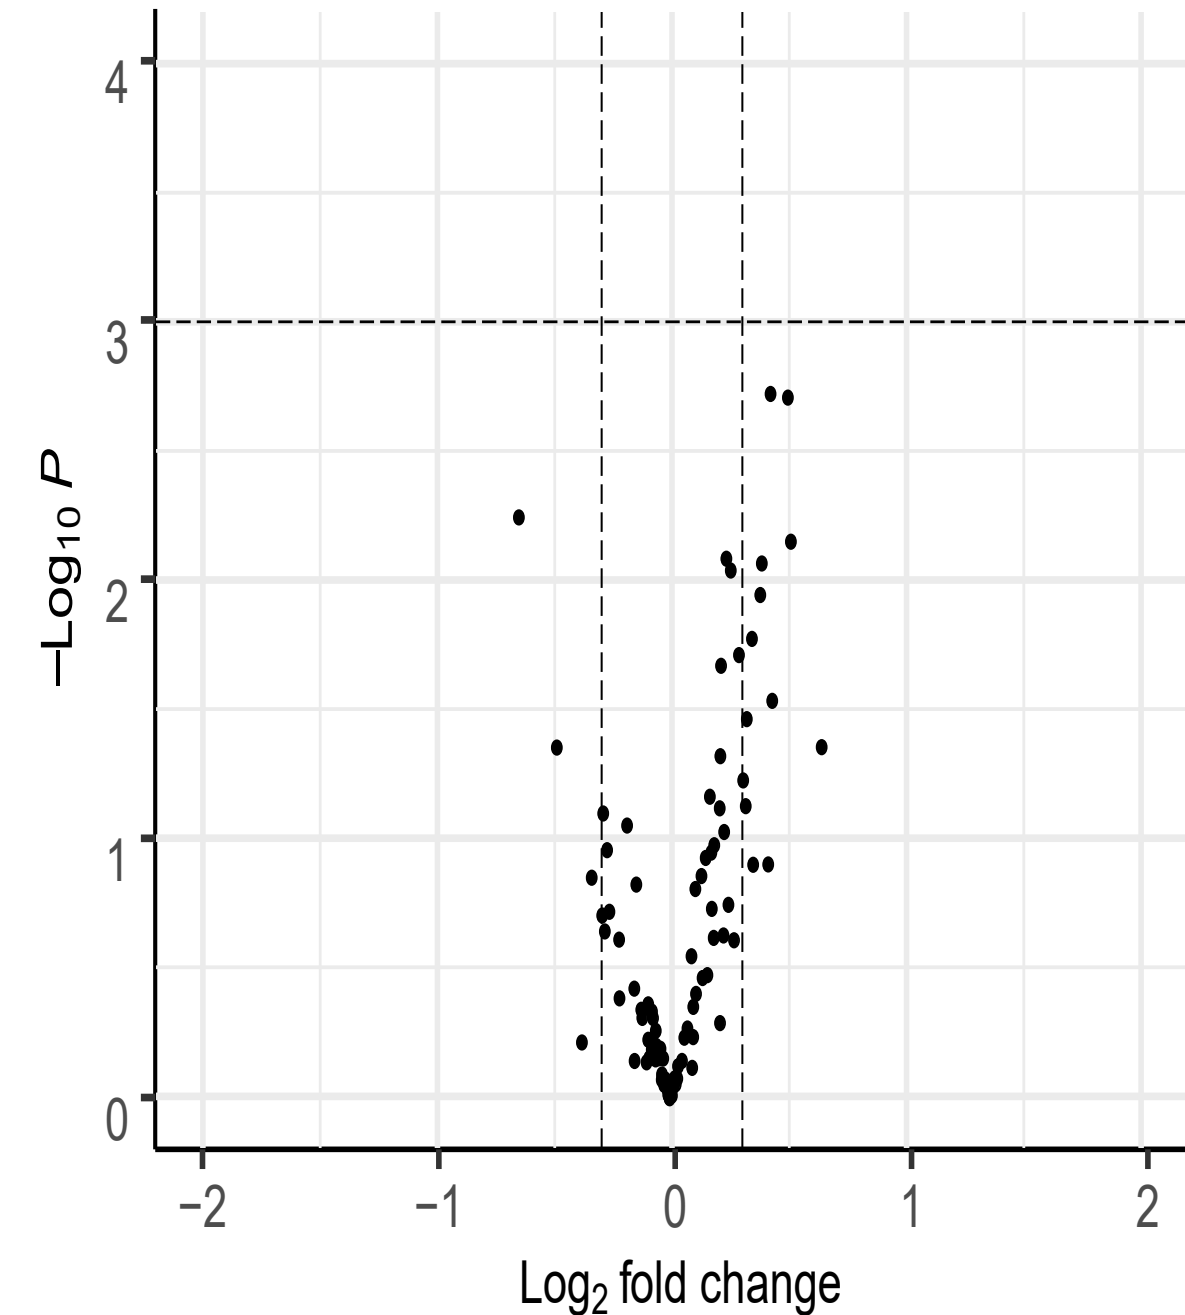

**Figure S3. Differential imprinted gene expression analysis comparing male and female placentas from normotensive pregnancies delivered at term.** Volcano plot depicting log<sub>2</sub> fold change values on the x-axis and -log<sub>10</sub> p-values on the y-axis. Points falling above the horizontal dashed line indicate genes significantly differentially expressed based on an FDR < 0.05. No significant sex differences in gene expression levels are observed.

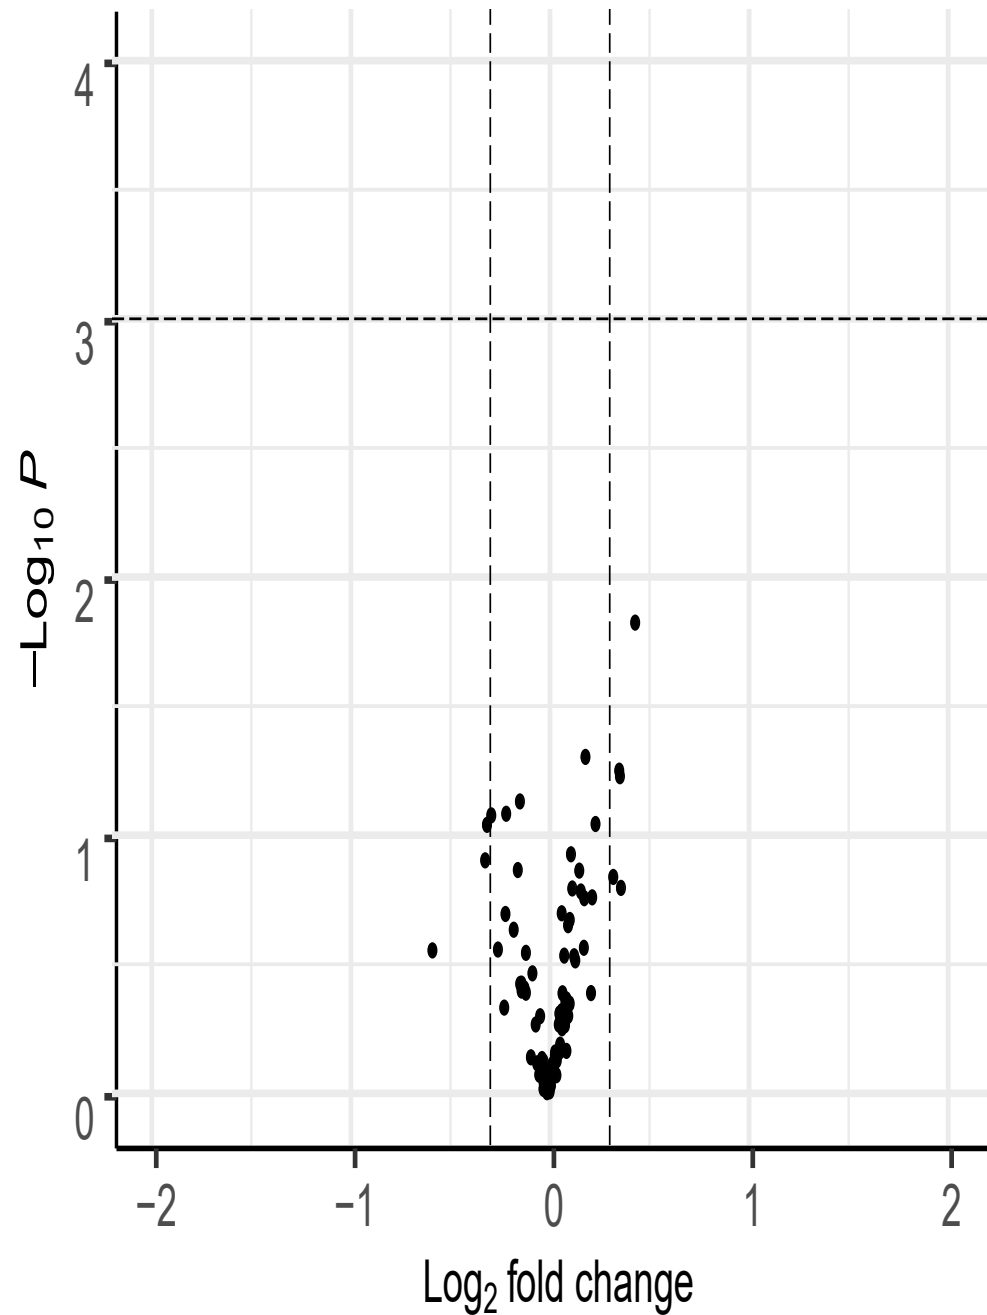

**Figure S4. Differential placental imprinted gene expression analysis between late onset cases and term controls, restricted to those who underwent labor.** Points falling above the horizontal dashed line indicate genes significantly differentially expressed based on an FDR < 0.05. No genes are differentially expressed between cases and controls.

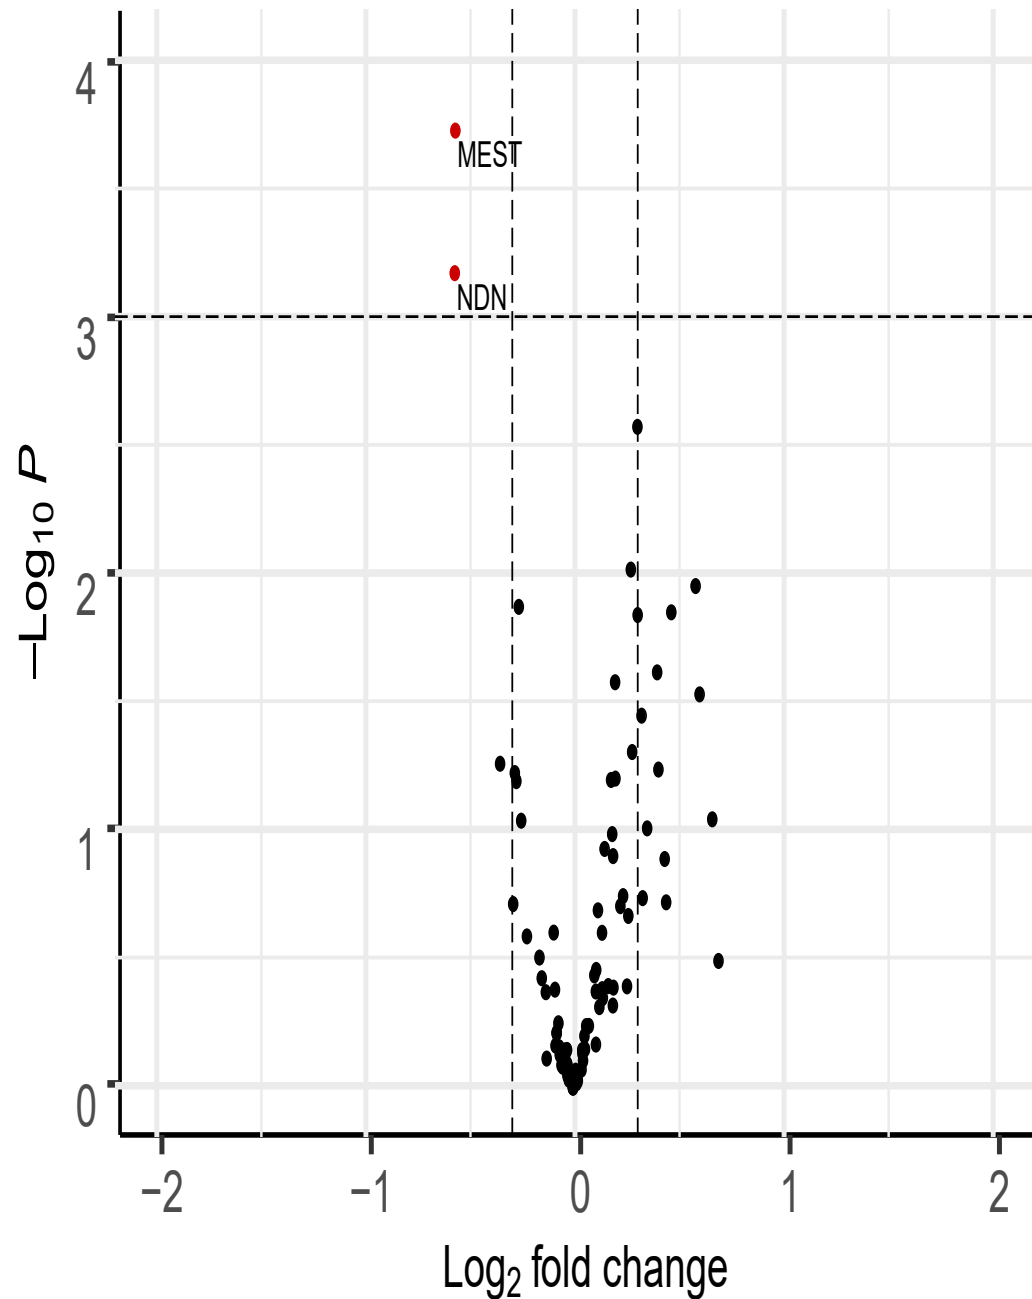

**Figure S5. Differential placental imprinted gene expression analysis between early onset cases and preterm controls, restricted to those who underwent labor.** The volcano plot depicts  $\log_2$  fold change values between cases and controls on the x-axis and  $-\log_{10} p$ -values on the y-axis. Points (in red) falling above the horizontal dashed line indicate genes that are significantly differentially expressed based on an FDR < 0.05. Two genes, MEST and NDN, are differentially expressed between cases and controls.

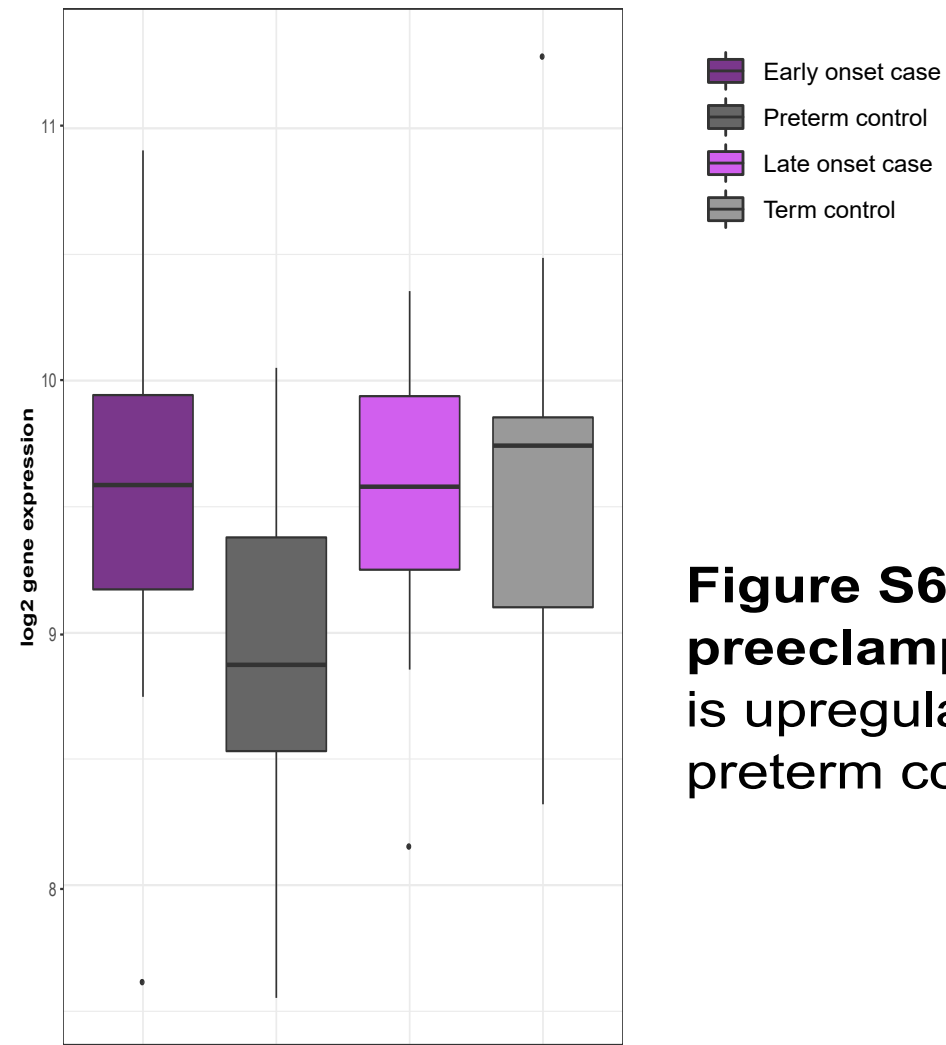

**Figure S6. *DLX5* gene expression levels across preeclampsia cases and controls.** *DLX5* gene expression is upregulated among early onset cases compared to preterm controls (FDR=0.15).
